# Supplementary material for: The human endogenous attentional control network includes a ventro-temporal cortical node
Source: PubMed Central journal article supplement (PMC7810878; doi:10.1038/s41467-020-20583-5), 2021-01-15
Supplement: 41467_2020_20583_MOESM1_ESM.pdf [file 41467_2020_20583_MOESM1_ESM.pdf]

1 **Supplementary Information**

2 **The human attentional control network includes a ventro-temporal**  
3 **cortical node**

4  
5  
6 **Ilaria Sani<sup>a,b\*</sup>, Heiko Stemmann<sup>c\*</sup>, Bradley Caron<sup>d</sup>, Daniel Bullock<sup>d</sup>, Torsten**  
7 **Stemmler<sup>c</sup>, Manfred Fahle<sup>c</sup>, Franco Pestilli<sup>d,e</sup>, Winrich A. Freiwald<sup>a,f</sup>**

8  
9 a Laboratory of Neural Systems, The Rockefeller University, 1230 York Avenue, New York, NY 10065, USA.

10 b Laboratory of Neurology & Imaging of Cognition, University of Geneva, Chemin de mines 9, 1202, Geneva, CH.

11 c Institute for Brain Research and Center for Advanced Imaging, University of Bremen, D-28334 Bremen, Germany.

12 d Department of Psychological and Brain Sciences, Indiana University, Bloomington, IN, USA.

13 e Department of Psychology, The University of Texas at Austin, Austin, TX 78712

14 f Center for Brains, Minds & Machines

15 \* These authors equally contributed to this work.

16

17 **Supplementary Table1.**

| AREA   | Talairach   |            | KOLSTER Talairach |           |
|--------|-------------|------------|-------------------|-----------|
|        | LH          | RH         | LH                | RH        |
| MT+    | -48 -74 6   | 48 -60 6   | -48 -75 3         | 46 -78 6  |
| phPIT  | -42 -73 -11 | 45 -75 -10 | -40 -85 -6        | 42 -85 -9 |
| LOC    | -48 -66 -4  | 56 -64 -8  | -42 -89 -2        | 40 -91 -3 |
|        |             |            | -36 -90 4         | 36 -92 3  |
| PHA    | -22 -42 -12 | 28 -42 -6  | n.a.              | n.a.      |
| Faces1 | -44 -70 -14 | 48 -74 -12 | n.a.              | n.a.      |
| Faces2 | -42 -48 -18 | 42 -42 -22 | n.a.              | n.a.      |
| TPJ    | -42 -76 37  | 57 -64 31  | n.a.              | n.a.      |

18

19 **Supplementary Table 1 – related to figure 3: Average Talairach (MNI) coordinates of the center of seven sets**  
 20 **of functionally defined areas.** Average Talairach coordinates (MNI) of the center of areas lobe in the left and right  
 21 hemispheres of the temporal lobe defined through the attention task (phPIT) and localizers (motion: MT+; object:  
 22 LOC; places: PHA; faces: FACES1 and 2). For comparison, Talairach coordinates of the same areas defined in a  
 23 recent retinotopic experiment are also shown (left columns)<sup>1</sup>. MT+: middle temporal complex; phPIT, putative human  
 24 posterior infero-temporal area; LOC: lateral occipital complex; PHA: parahippocampal area; Faces1-2: face area 1-2;  
 25 TPJ: temporo parietal junction.

26 **Supplementary Table2.**

|                                 |             |             |             |             |             |             |             |             |             |             |             |             |             |             |             |             |             |             |             |             |             |
|---------------------------------|-------------|-------------|-------------|-------------|-------------|-------------|-------------|-------------|-------------|-------------|-------------|-------------|-------------|-------------|-------------|-------------|-------------|-------------|-------------|-------------|-------------|
| <b>Attention</b>                | 0.54        | 0.54        | 0.28        | 0.11        | 0.08        | 0.36        | <b>0.02</b> | 0.06        | 0.17        | 0.08        | <b>0.02</b> | <b>0.04</b> | <b>0.53</b> | 0.23        | 0.43        | <b>0.01</b> | 0.06        | 0.14        | 0.19        | 0.29        | 0.34        |
| <b>Motion (10<sup>-3</sup>)</b> | <b>0.00</b> | <b>0.00</b> | <b>0.00</b> | <b>0.00</b> | <b>0.01</b> | <b>0.04</b> | <b>0.00</b> | <b>0.00</b> | <b>0.00</b> | <b>0.00</b> | <b>0.01</b> | <b>0.10</b> | <b>2.47</b> | <b>1.24</b> | <b>5.84</b> | <b>0.00</b> | <b>0.11</b> | <b>0.00</b> | <b>0.32</b> | <b>3.33</b> | <b>0.41</b> |
| <b>Static (10<sup>-2</sup>)</b> | <b>0.00</b> | <b>0.00</b> | <b>0.00</b> | 0.17        | <b>0.00</b> | <b>0.00</b> | 0.43        | 0.57        | 0.75        | 0.13        | <b>0.00</b> | 0.10        | 0.45        | 0.84        | 0.31        | <b>0.00</b> | <b>0.01</b> | 0.15        | 0.61        | 0.87        | 0.54        |
| <b>Shapes</b>                   | 0.63        | 0.63        | 0.58        | 0.37        | 0.61        | 0.83        | <b>0.00</b> | <b>0.01</b> | <b>0.03</b> | <b>0.02</b> | 0.62        | <b>0.03</b> | <b>0.03</b> | <b>0.02</b> | 0.09        | 0.89        | <b>0.00</b> | 0.92        | 0.55        | 0.76        | 0.88        |
|                                 | V1          | V2          | V3          | V3A         | V3B         | V4          | V4t         | MT          | MST         | FST         | <b>PIT</b>  | FCC         | PHIA1       | PHIA2       | PHIA3       | LO1         | LO2         | LO3         | LIPv        | LIPd        | IPS1        |

27

28 **Supplementary Table 2 – related to figure 5.** p-values for the statistics testing significance of response differences

29 in the attention task (attended vs. unattended; one-sided paired t-test, uncorrected for multiple comparisons), motion

30 localizer (moving vs. static stimuli; one-sided paired t-test, uncorrected for multiple comparisons), responsivity to

31 static stimuli (one-sided t-test, uncorrected for multiple comparisons) and shape localizer (faces, scenes, objects; one-

32 way ANOVA uncorrected for multiple comparisons). Significant effects are indicated in bold ( $p < 0.05$ ). Please note

33 p-values  $< 10^{-5}$  (for motion),  $10^{-4}$  (for static),  $10^{-2}$  (for shapes) are indicated as 0. V1-2-3-3A-3B-4: visual areas 1-2-

34 3-3A-3B-4; V4t: visual area 4 transition; MT+: middle temporal; MST: middle superior temporal; FST: fundus

35 superior temporal; pHIT: putative human posterior infero-temporal area; FCC: fusiform face complex; PH1-2-3, para-

36 hippocampal area 1-2-3; LO1-2-3: lateral occipital areas 1-2-3; LIPv: ventral latera intraparietal area; LIPd: dorsal

37 latera intraparietal area; IPS1: intra parietal sulcus 1; other conventions as in Supplementary Table 1.

38 **Supplementary Table3.**

| <b>Application</b>              | <b>Github repository</b>                                                                                                                      | <b>Open Service DOI</b>                                                                             |
|---------------------------------|-----------------------------------------------------------------------------------------------------------------------------------------------|-----------------------------------------------------------------------------------------------------|
| <b>DATA PREPARATION</b>         |                                                                                                                                               |                                                                                                     |
| Bvec Normalization              | <a href="https://github.com/brain-life/app-datanormalize">https://github.com/brain-life/app-datanormalize</a>                                 | <a href="https://doi.org/10.25663/bl.app.4">https://doi.org/10.25663/bl.app.4</a>                   |
| T1 AC-PC Alignment              | <a href="https://github.com/brain-life/app-acpcART">https://github.com/brain-life/app-acpcART</a>                                             | <a href="https://doi.org/10.25663/bl.app.16">https://doi.org/10.25663/bl.app.16</a>                 |
| Register to T1                  | <a href="https://github.com/brainlife/app-dtiinit">https://github.com/brainlife/app-dtiinit</a>                                               | <a href="https://doi.org/10.25663/bl.app.3">https://doi.org/10.25663/bl.app.3</a>                   |
| dMRI Shell Splitting            | <a href="https://github.com/brain-life/app-splitshells">https://github.com/brain-life/app-splitshells</a>                                     | <a href="https://doi.org/10.25663/bl.app.17">https://doi.org/10.25663/bl.app.17</a>                 |
| NODDI Fit via Amico             | <a href="https://github.com/brain-life/app-noddi-amico">https://github.com/brain-life/app-noddi-amico</a>                                     | <a href="https://doi.org/10.25663/bl.app.35">https://doi.org/10.25663/bl.app.35</a>                 |
| <b>ROI</b>                      |                                                                                                                                               |                                                                                                     |
| Multi-Atlas Transfer Tool       | <a href="https://github.com/faskowit/app-multiAtlasTT">https://github.com/faskowit/app-multiAtlasTT</a>                                       | <a href="https://doi.org/10.25663/bl.app.23">https://doi.org/10.25663/bl.app.23</a>                 |
| ROI Generation Tool             | <a href="https://github.com/brain-life/app-roiGenerator">https://github.com/brain-life/app-roiGenerator</a>                                   | <a href="https://doi.org/10.25663/bl.app.37">https://doi.org/10.25663/bl.app.37</a>                 |
| <b>TRACTOGRAPHY</b>             |                                                                                                                                               |                                                                                                     |
| ROI to ROI Ensemble             |                                                                                                                                               |                                                                                                     |
| Tractography                    | <a href="https://github.com/brain-life/app-roi2roittracking">https://github.com/brain-life/app-roi2roittracking</a>                           | <a href="https://doi.org/10.25663/bl.app.34">https://doi.org/10.25663/bl.app.34</a>                 |
| Ensemble Tractography           | <a href="https://github.com/brain-life/app-ensembletracking">https://github.com/brain-life/app-ensembletracking</a>                           | <a href="https://doi.org/10.25663/bl.app.33">https://doi.org/10.25663/bl.app.33</a>                 |
| Remove Tract Outliers           | <a href="https://github.com/brainlife/app-AFQclean">https://github.com/brainlife/app-AFQclean</a>                                             | <a href="https://doi.org/10.25663/bl.app.11">https://doi.org/10.25663/bl.app.11</a>                 |
| Tract Profiles                  | <a href="https://github.com/brain-life/app-tractanalysisprofiles">https://github.com/brain-life/app-tractanalysisprofiles</a>                 | <a href="https://doi.org/10.25663/bl.app.43">https://doi.org/10.25663/bl.app.43</a>                 |
| Tract Statistics                | <a href="https://github.com/kitchell/app-classifiedfibertractstats">https://github.com/kitchell/app-classifiedfibertractstats</a>             | <a href="https://doi.org/10.25663/bl.app.12">https://doi.org/10.25663/bl.app.12</a>                 |
| Linear Fascicle Evaluation      | <a href="https://github.com/brainlife/app-life">https://github.com/brainlife/app-life</a>                                                     | <a href="https://doi.org/10.25663/bl.app.1">https://doi.org/10.25663/bl.app.1</a>                   |
| White matter Tract Segmentation | <a href="https://github.com/brain-life/app-wmaSeg">https://github.com/brain-life/app-wmaSeg</a>                                               | <a href="https://doi.org/10.25663/bl.app.41">https://doi.org/10.25663/bl.app.41</a>                 |
| Generate tract endpoint maps    | <a href="https://github.com/brainlife/app-endpointMapGeneration/tree/1.0">https://github.com/brainlife/app-endpointMapGeneration/tree/1.0</a> | <a href="https://doi.org/10.25663/brainlife.app.194">https://doi.org/10.25663/brainlife.app.194</a> |
| <b>CONTROLS</b>                 |                                                                                                                                               |                                                                                                     |
| Attention ROI Warp              | <a href="https://github.com/brainlife/Attention_ROI_warp">https://github.com/brainlife/Attention_ROI_warp</a>                                 | <a href="https://doi.org/10.25663/brainlife.app.168">https://doi.org/10.25663/brainlife.app.168</a> |

39

40 **Supplementary Table 3 – related to figure 6 and 7.** Description and web-links to the open source code and open  
 41 cloud services used in the creation and analysis of the diffusion MRI dataset.

42 **Supplementary Table 4.**

| CONTROL PROPERTY                                  | Theoretical proposals <sup>2</sup> | FEF (2) | LIP (3) | phPIT (4) | TPJ (5) | V1 (6) |
|---------------------------------------------------|------------------------------------|---------|---------|-----------|---------|--------|
| Activation during prolonged endogenous attention  | ✓                                  | ✓       | ✓       | ✓         | x       | x      |
| Independence of specific visual features          | ✓                                  | ✓       | ✓       | ✓         | ✓       | x      |
| Causal relationship with attentive behavior/state | ✓                                  | ✓       | ✓       | ✓         | n.a.    | x      |
| Sustained neuronal response for attention signals | ✓                                  | ✓       | ✓       | ✓         | n.a.    | x      |
| Neuropsychological evidence                       | n.a.                               | ✓       | ✓       | ✓         | ✓       | x      |

43

44 **Supplementary Table 4– related to figure 3, 4, and discussion.** A checklist of functional properties required to  
 45 define an attention control area is shown for dorsal attention nodes FEF (frontal eye fields) and LIP (lateral intra-  
 46 parietal area), for phPIT (putative human posterior infero-temporal area)), and for TPJ (temporo parietal junction) and  
 47 V1 (visual area 1) for comparison. Example references are provided below: (1)<sup>2</sup>; (2)<sup>2-7</sup> (3)<sup>4,5</sup>; (4)<sup>1,8-12</sup> (5)<sup>13,14</sup> (6)<sup>15-18</sup>.

48 **Supplementary Figure 1**

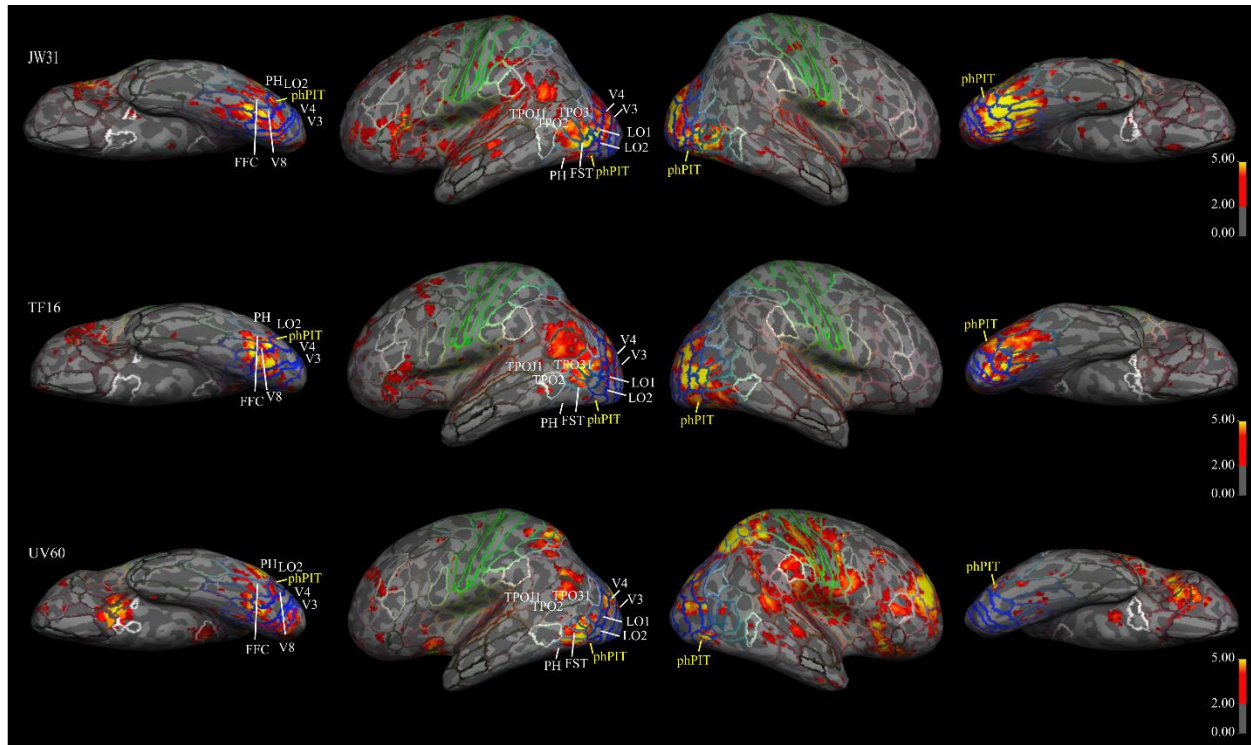

49  
50 **Supplementary Figure 1 – related to Figure 3. Activation for the attentive motion discrimination for three**  
51 **individual subjects.** Statistical parametric maps of the contrast ‘attend contralaterally versus ipsilaterally’ overlaid  
52 on the inflated brains of three single subjects. Task-related activations (yellow/red) are shown on lateral and inferior  
53 views of the brain and superimposed on the Glasser atlas parcellation<sup>19</sup>. As expected, attention modulated early visual  
54 areas like V3, V4, and motion areas MT, MST and FST. Surprisingly attention, activated phPIT and V8 area. The  
55 color-bar shows T-values task-related activations. FFC: fusiform face area; FST: fundus superior temporal area; LO1-  
56 2: lateral occipital areas 1-2; PH: basal temporo-occipital area; phPIT: putative human posterior infero-temporal area;  
57 TPOJ-1-2-3: temporo parietal occipital junction 1-2-3; V2-3-8: visual areas 2-3-8.

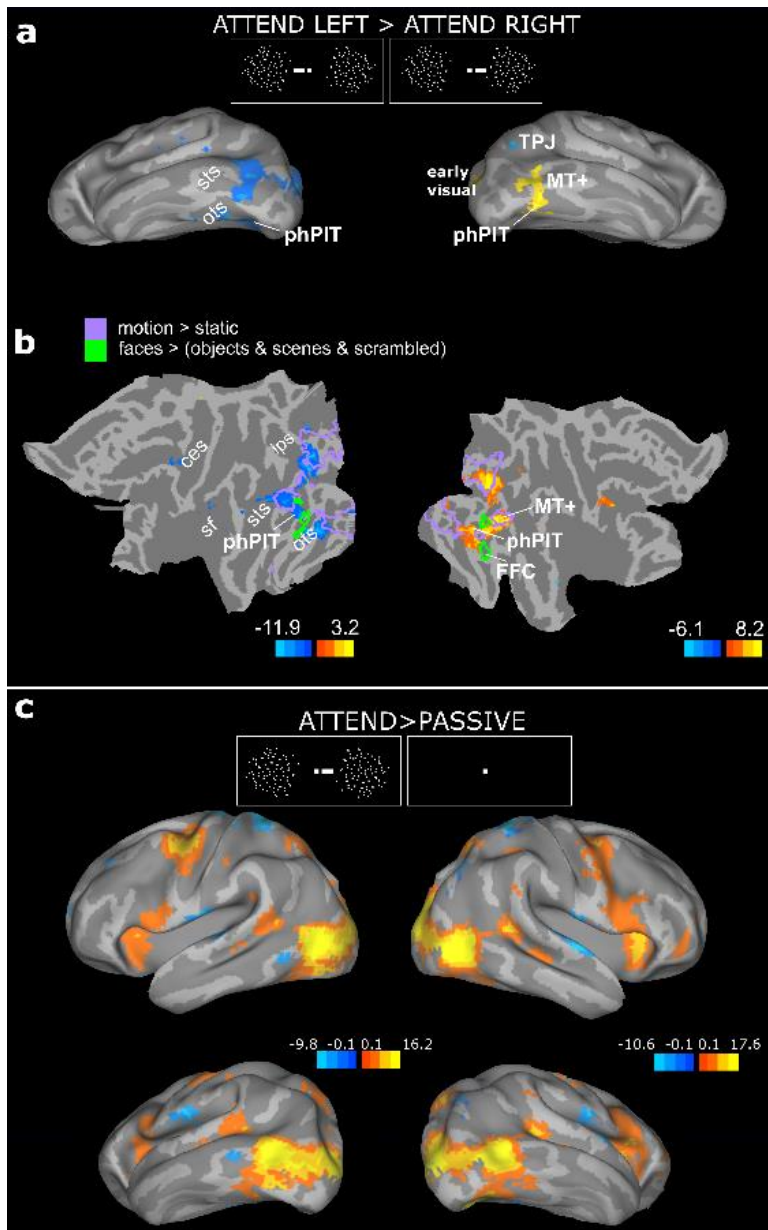

59  
 60 **Supplementary Figure 2 – related to Figure 3-4. phPIT functional profile random effect group analysis.** **a.** Statistical  
 61 parametric maps of the contrast ‘attend left versus right’ for the random effect group analysis overlaid on the inferior  
 62 views of the average human inflated brain. **b.** Statistical parametric maps of the contrast ‘attend left versus right’  
 63 for the random effect group analysis overlaid on flat map of the left and right hemispheres; solid lines show visual  
 64 selectivity for motion (purple) and faces (green). The color-bar shows T-values task-related activations and  
 65 inactivations. **c.** Statistical parametric maps of the contrast ‘attention (ATTEND) vs. passive fixation (PASSIVE)’

66 overlaid on the lateral and inferior views of the inflated average human brain. The color-bar shows T-values task-  
67 related activations (yellow/red) and inactivation (blue). ces: central sulcus; ips: intra-parietal sulcus; ots: Occipito-  
68 temporal sulcus; sf: Sylvian Fissure; sts: superior temporal sulcus; FFC: fusiform face area; MT+: middle temporal  
69 area; phPIT: putative human posterior infero-temporal area; TPJ: temporo-parietal junction; other conventions as in  
70 Supplementary Table 1-2.



71 **Supplementary Figure 3**

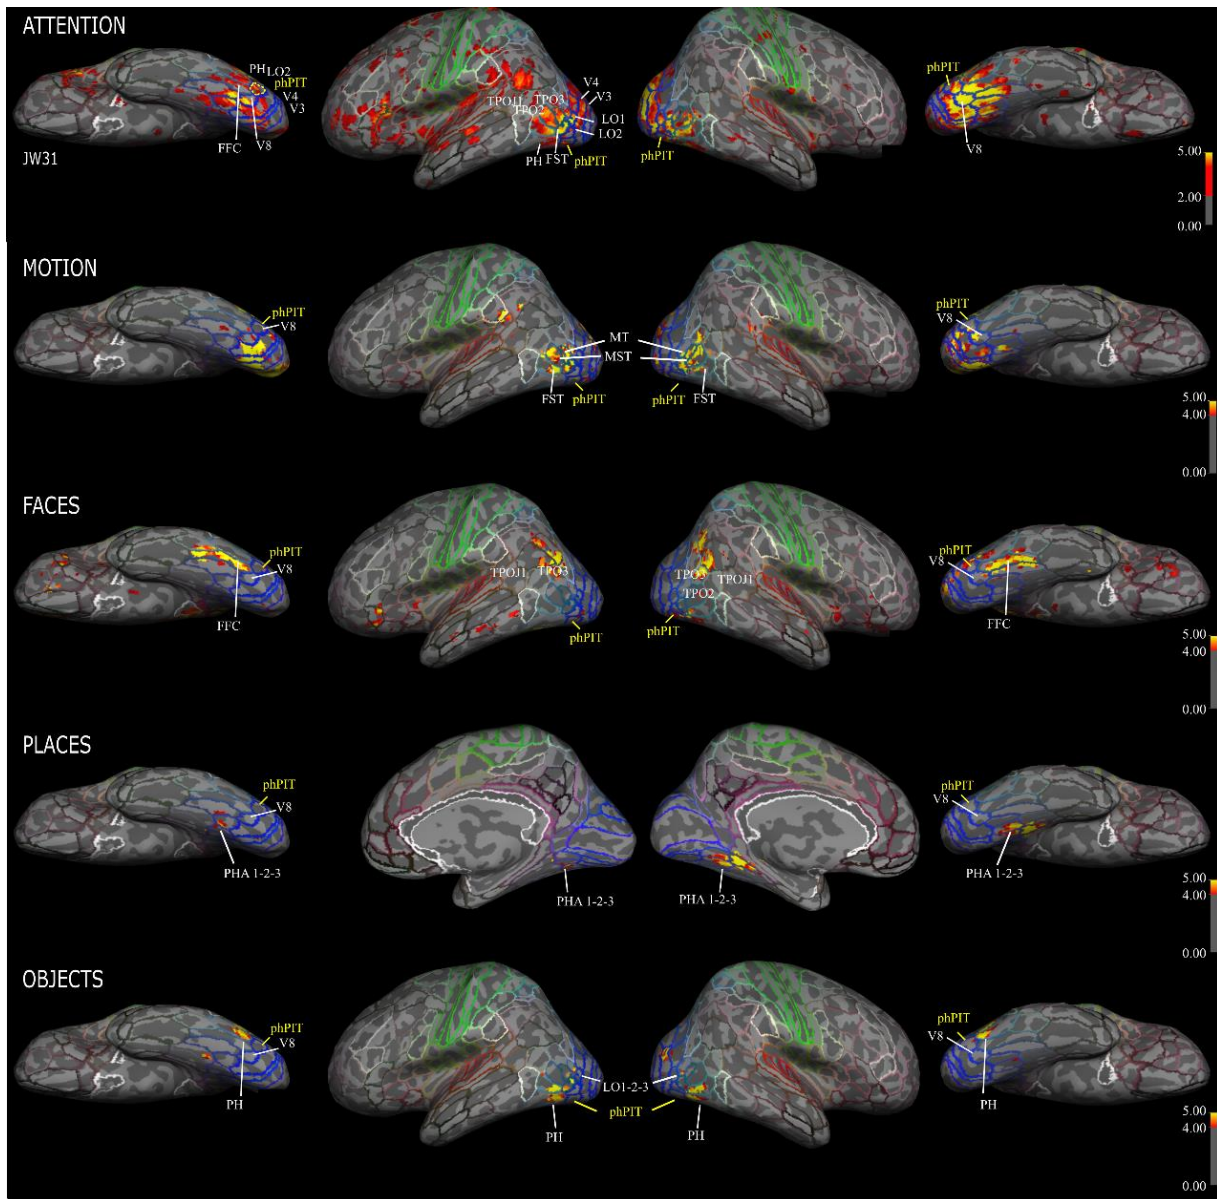

72

73 **Supplementary Figure 3 – related to Figure 3-4. Individual subject functional characterization of phPIT.**

74 Statistical parametric maps of attention and four different localizers overlaid on the inflated brain of a single subject.

75 Task-related activations (yellow/red) are shown on both lateral and inferior views and superimposed on the Glasser

76 atlas parcellation<sup>19</sup>. Early visual areas like V3, V4, and motion areas MT, MST and FST were modulated by attention,

77 but also strongly activated by moving stimuli, the task relevant dimension, while being unresponsive to other higher

78 order visual stimuli. Higher order visual areas like FFC, PPA, LOC and PH<sup>19</sup> were activated by faces, places, and

79 objects respectively, but not by attention. Critically, phPIT and area V8, were activated by attention but were not  
80 selective for other visual stimuli suggesting a general role in attention. The color-bar shows T-values task-related  
81 activations. FFC: fusiform face area; FST: fundus superior temporal area; LO1-2: lateral occipital areas 1-2; MT:  
82 middle temporal area; MST: middle superior temporal area; PH: basal temporo-occipital area; phPIT: putative human  
83 posterior infero-temporal area; TPOJ-1-2-3: temporo parietal occipital junction 1-2-3; V8: visual area 8.

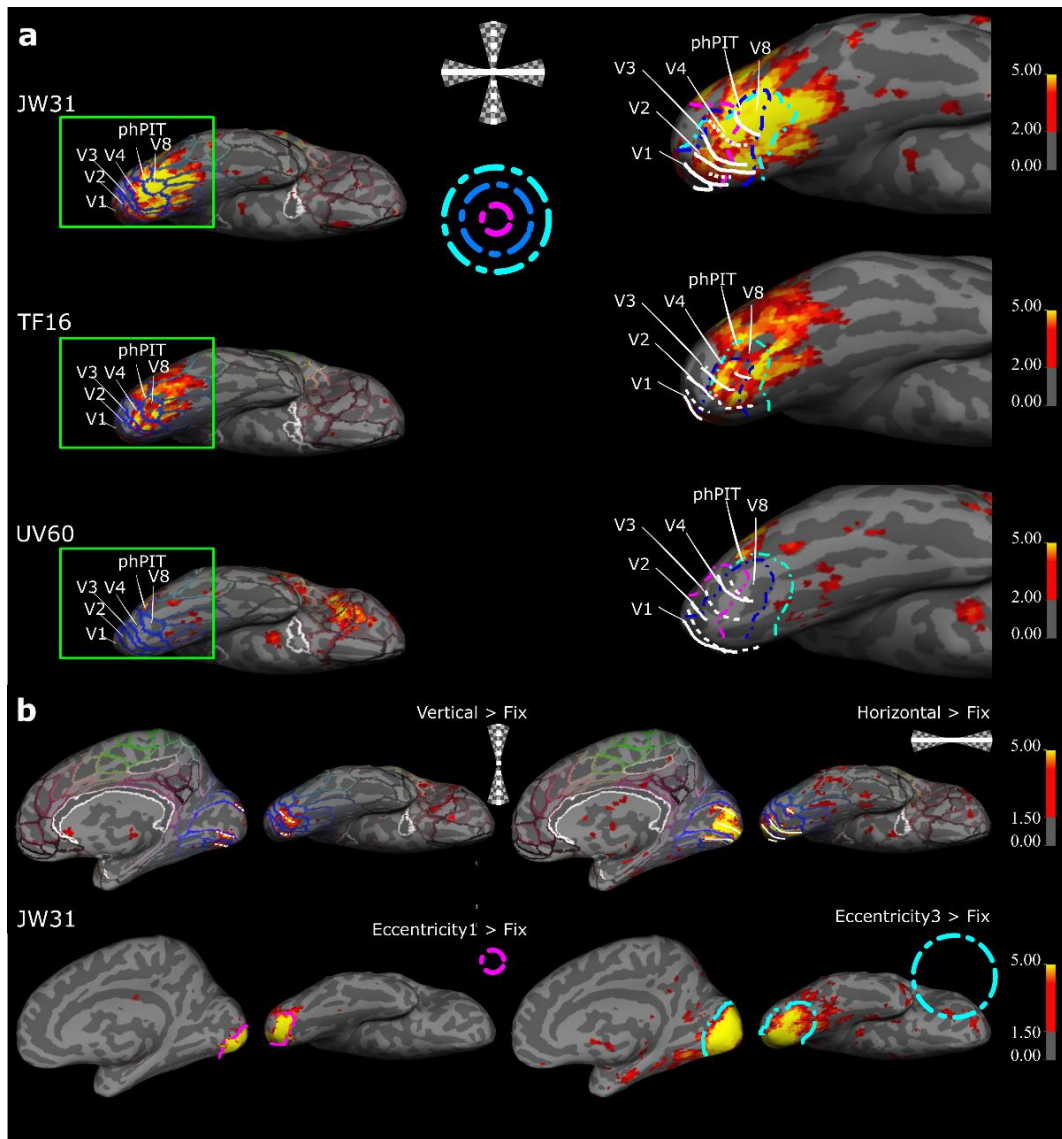

85

86 **Supplementary Figure 4 – related to Figure 3. Individual subject retinotopic and eccentricity characterization**  
 87 **of attentional activation in phPIT.** **A.** Statistical parametric maps of attention superimposed with meridians and  
 88 eccentricity boundaries are overlaid on the inflated brain of three single subjects. Task-related activations (yellow/red)  
 89 are shown on the inferior views and superimposed on the Glasser atlas parcellation<sup>19</sup> (first column) and with  
 90 retinotopic and eccentricity mapping (second column – enlarged view). Full and dotted white lines indicate horizontal  
 91 and vertical meridians respectively; colored dashed lines show positions of central, intermediate and peripheral  
 92 eccentricity ridges. The combination of retinotopic and eccentricity mapping better clarified the separation between

93 the infero-temporal activation and that of early visual areas, and of other specialized areas located more anteriorly in  
94 the temporal lobe. In individual subjects we were able to identify the attentional activation in the infero-temporal  
95 cortex as the most anterior and ventral region possessing a retinotopic organization, but not strong motion selectivity,  
96 nor complex object selectivity. In Glasser nomenclature phPIT corresponded to phPIT and V8 areas. **B.** Statistical  
97 parametric maps of retinotopic (top, vertical and horizontal wedge) and eccentricity (bottom, inner and outer ring) for  
98 a representative subject. The color-bar shows T-values task-related activations. phPIT: putative human posterior  
99 infero-temporal area; V1-2-3-84-: visual areas 1-2-3-4-8.

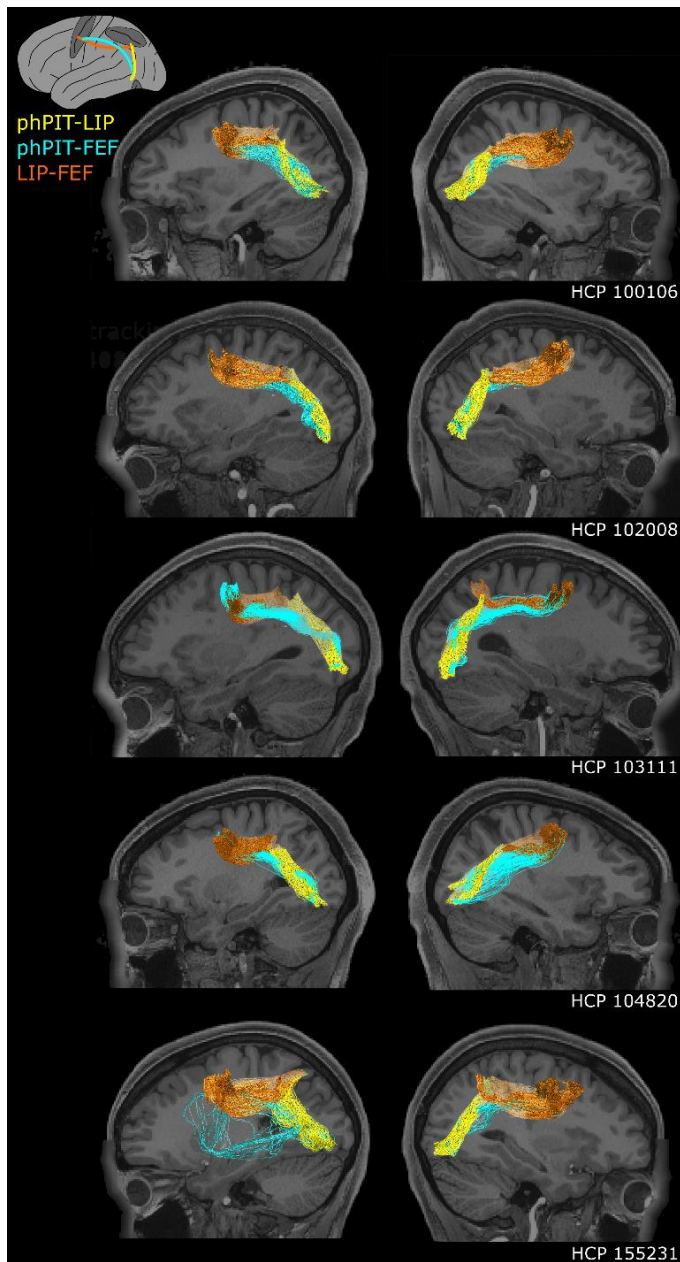

101

102 **Supplementary Figure 5 – related to Figure 5. Core of the tract.** Sagittal-view of phPIT-to-LIP (yellow), phPIT-  
103 to-FEF (cyan), and LIP-to-FEF (orange) connections overlaid on T1 image for five example subjects from the HCP.  
104 The core of the tract was consistent across subjects. For about 20% of the subjects the phPIT-to-FEF showed some  
105 branching (lowest row). FEF: frontal eye field; LIP: lateral intra parietal; phPIT: putative human posterior infero-  
106 temporal area. Source data are available at <https://doi.org/10.25663/BRAINLIFE.PUB.17>.

107 **Supplementary Figure 6**

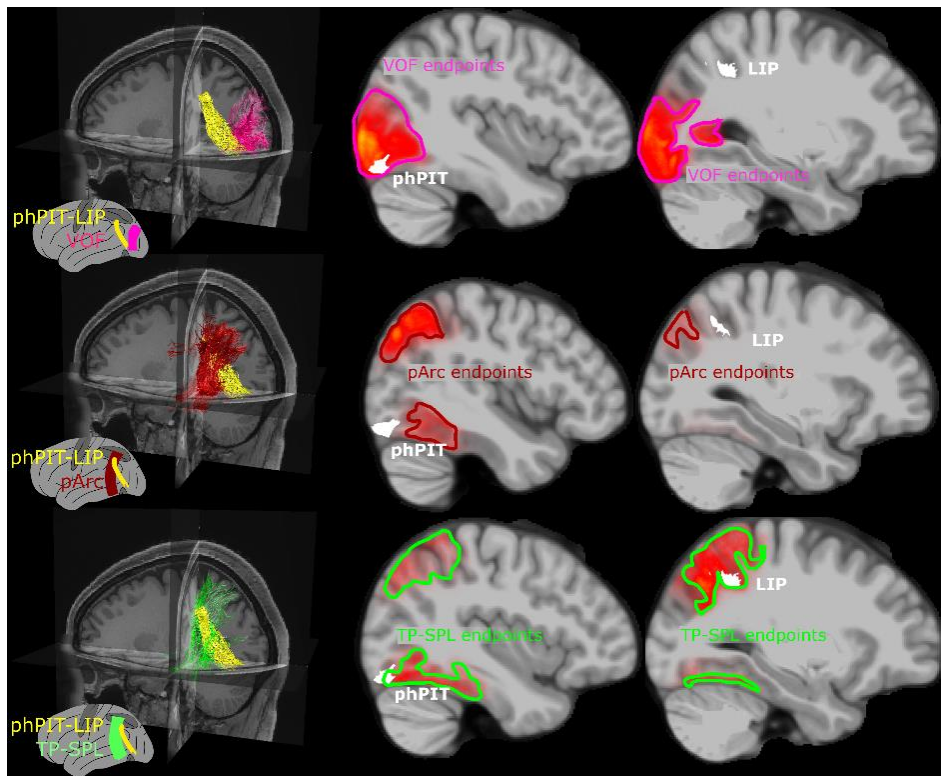

108

109 **Supplementary Figure 6 – related to Figure 7. An unreported sup-portion of the pArct supports the endogenous**  
110 **attention network.** Different views of phPIT-to-LIP connections (yellow) and nearby anatomical tracts VOF (pink),  
111 pArc (dark red) and TP-SPL (green) overlaid on T1 image for a single example subject from the HCP (101006).  
112 phPIT-to-LIP pathway departs from that of traditionally segmented tracts. Right panels show density mapping of the  
113 superior and inferior cortical endpoints for the anatomical tracts. Density projections are summed across 1000 HCP  
114 subjects; darker coloring of the heat map corresponds to higher densities. White areas correspond to the ROIs used to  
115 generate the attention tracts. LIP, Lateral Intraparietal area; phPIT, putative human Posterior Infero-Temporal area;  
116 pArc, posterior Arcuate Fasciculus; TP-SPL; Temporo-Parietal connection to the Superior Temporal Lobule; VOF,  
117 Vertical Occipital Fasciculus. Source data are available at <https://doi.org/10.25663/BRAINLIFE.PUB.17>.

118



119 **Supplementary Figure 7 – related to Figure 5. Tracking results with control ROIs.**

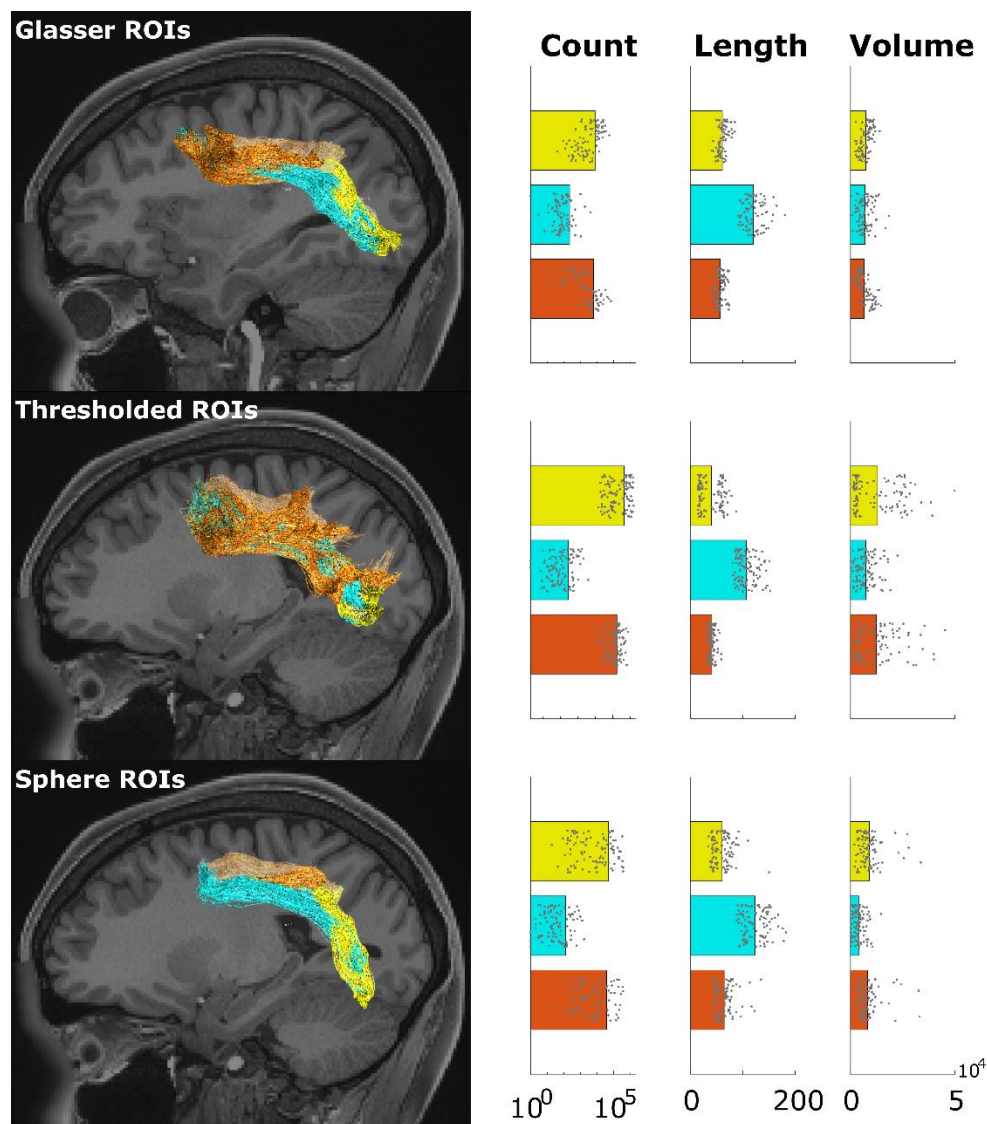

120  
 121 **Supplementary Figure 7 – related to Figure 5. Tracking results with control regions of interest (ROIs).** Left  
 122 column shows sagittal-views of phPIT-to-LIP (yellow), phPIT-to-FEF (cyan), and LIP-to-FEF (orange) connections  
 123 overlaid on T1 image for an example subjects from the HCP. The core and pathway of the tracts were consistent even  
 124 when tracking was performed with Glasser ROIs, thresholded ROIs and sphere ROIs (see Methods). Right column  
 125 shows average streamline number, tract length (mm), tract volume (mm<sup>3</sup>) are shown for each functional tract for the  
 126 three different tracking Methods. Data are expressed as mean across 50 subjects and collapsed across hemispheres;  
 127 gray points represent the values for each individual subject and hemisphere. FEF: frontal eye field; LIP: lateral intra  
 128 parietal; phPIT: putative human posterior infero-temporal area. Source data are provided as a Source Data file.

129 **References**

130 1. Kolster, H., Peeters, R. & Orban, G. A. The retinotopic organization of the human middle temporal  
131 area MT/V5 and its cortical neighbors. *J. Neurosci.* **30**, 9801–9820 (2010).

132 2. Fecteau, J. H. & Munoz, D. P. Saliency, relevance, and firing: a priority map for target selection.  
133 *Trends Cogn. Sci. (Regul. Ed.)* **10**, 382–390 (2006).

134 3. Rossi, A. F., Bichot, N. P., Desimone, R. & Ungerleider, L. G. Top down attentional deficits in  
135 macaques with lesions of lateral prefrontal cortex. *J. Neurosci.* **27**, 11306–11314 (2007).

136 4. Kastner, S. & Ungerleider, L. G. Mechanisms of visual attention in the human cortex. *Annu. Rev.*  
137 *Neurosci.* **23**, 315–341 (2000).

138 5. Corbetta, M. & Shulman, G. L. Control of goal-directed and stimulus-driven attention in the brain.  
139 *Nat. Rev. Neurosci.* **3**, 201–215 (2002).

140 6. Bichot, N. P., Heard, M. T., DeGennaro, E. M. & Desimone, R. A Source for Feature-Based  
141 Attention in the Prefrontal Cortex. *Neuron* **88**, 832–844 (2015).

142 7. Moore, T. & Armstrong, K. M. Selective gating of visual signals by microstimulation of frontal  
143 cortex. *Nature* **421**, 370–373 (2003).

144 8. Stemmann, H. & Freiwald, W. A. Evidence for an attentional priority map in inferotemporal cortex.  
145 *Proc. Natl. Acad. Sci. USA* **116**, 23797–23805 (2019).

146 9. Stemmann, H. & Freiwald, W. A. Attentive motion discrimination recruits an area in inferotemporal  
147 cortex. *J. Neurosci.* **36**, 11918–11928 (2016).

148 10. Kolster, H., Janssens, T., Orban, G. A. & Vanduffel, W. The retinotopic organization of macaque  
149 occipitotemporal cortex anterior to V4 and caudoventral to the middle temporal (MT) cluster. *J.*  
150 *Neurosci.* **34**, 10168–10191 (2014).

151 11. Bogadhi, A. R., Bollimuntha, A., Leopold, D. A. & Krauzlis, R. J. Spatial attention deficits are  
152 causally linked to an area in macaque temporal cortex. *Curr. Biol.* **29**, 726–736.e4 (2019).

153 12. Bogadhi, A. R., Bollimuntha, A., Leopold, D. A. & Krauzlis, R. J. Brain regions modulated during  
154 covert visual attention in the macaque. *Sci. Rep.* **8**, 15237 (2018).

155 13. Doricchi, F., Macci, E., Silvetti, M. & Macaluso, E. Neural correlates of the spatial and expectancy  
156 components of endogenous and stimulus-driven orienting of attention in the Posner task. *Cereb.*  
157 *Cortex* **20**, 1574–1585 (2010).

158 14. Shulman, G. L., Astafiev, S. V., McAvoy, M. P., d Avossa, G. & Corbetta, M. Right TPJ  
159 deactivation during visual search: functional significance and support for a filter hypothesis. *Cereb.*  
160 *Cortex* **17**, 2625–2633 (2007).

161 15. Serences, J. T. & Boynton, G. M. Feature-based attentional modulations in the absence of direct  
162 visual stimulation. *Neuron* **55**, 301–312 (2007).

163 16. Buracas, G. T. & Boynton, G. M. The effect of spatial attention on contrast response functions in  
164 human visual cortex. *J. Neurosci.* **27**, 93–97 (2007).



- 165 17. Maunsell, J. H. R. & Cook, E. P. The role of attention in visual processing. *Philos. Trans. R. Soc.*  
166 *Lond. B, Biol. Sci.* **357**, 1063–1072 (2002).
- 167 18. Reynolds, J. H. & Chelazzi, L. Attentional modulation of visual processing. *Annu. Rev. Neurosci.*  
168 **27**, 611–647 (2004).
- 169 19. Glasser, M. F. *et al.* A multi-modal parcellation of human cerebral cortex. *Nature* **536**, 171–178  
170 (2016).
- 171
