# Supplementary material for: The human endogenous attentional control network includes a ventro-temporal cortical node
Source: PubMed Central journal article supplement (PMC7810878; doi:10.1038/s41467-020-20583-5), 2021-01-15
Supplement: 41467_2020_20583_MOESM2_ESM.pdf [file 41467_2020_20583_MOESM2_ESM.pdf]

## Reporting Summary

Nature Research wishes to improve the reproducibility of the work that we publish. This form provides structure for consistency and transparency in reporting. For further information on Nature Research policies, see [Authors & Referees](#) and the [Editorial Policy Checklist](#).

### Statistics

For all statistical analyses, confirm that the following items are present in the figure legend, table legend, main text, or Methods section.

n/a Confirmed

- |                                     |                                     |                                                                                                                                                                                                                                                            |
|-------------------------------------|-------------------------------------|------------------------------------------------------------------------------------------------------------------------------------------------------------------------------------------------------------------------------------------------------------|
| <input type="checkbox"/>            | <input checked="" type="checkbox"/> | The exact sample size ( $n$ ) for each experimental group/condition, given as a discrete number and unit of measurement                                                                                                                                    |
| <input type="checkbox"/>            | <input checked="" type="checkbox"/> | A statement on whether measurements were taken from distinct samples or whether the same sample was measured repeatedly                                                                                                                                    |
| <input type="checkbox"/>            | <input checked="" type="checkbox"/> | The statistical test(s) used AND whether they are one- or two-sided<br><i>Only common tests should be described solely by name; describe more complex techniques in the Methods section.</i>                                                               |
| <input checked="" type="checkbox"/> | <input type="checkbox"/>            | A description of all covariates tested                                                                                                                                                                                                                     |
| <input type="checkbox"/>            | <input checked="" type="checkbox"/> | A description of any assumptions or corrections, such as tests of normality and adjustment for multiple comparisons                                                                                                                                        |
| <input type="checkbox"/>            | <input checked="" type="checkbox"/> | A full description of the statistical parameters including central tendency (e.g. means) or other basic estimates (e.g. regression coefficient) AND variation (e.g. standard deviation) or associated estimates of uncertainty (e.g. confidence intervals) |
| <input type="checkbox"/>            | <input checked="" type="checkbox"/> | For null hypothesis testing, the test statistic (e.g. $F$ , $t$ , $r$ ) with confidence intervals, effect sizes, degrees of freedom and $P$ value noted<br><i>Give <math>P</math> values as exact values whenever suitable.</i>                            |
| <input checked="" type="checkbox"/> | <input type="checkbox"/>            | For Bayesian analysis, information on the choice of priors and Markov chain Monte Carlo settings                                                                                                                                                           |
| <input checked="" type="checkbox"/> | <input type="checkbox"/>            | For hierarchical and complex designs, identification of the appropriate level for tests and full reporting of outcomes                                                                                                                                     |
| <input checked="" type="checkbox"/> | <input type="checkbox"/>            | Estimates of effect sizes (e.g. Cohen's $d$ , Pearson's $r$ ), indicating how they were calculated                                                                                                                                                         |

*Our web collection on [statistics for biologists](#) contains articles on many of the points above.*

### Software and code

Policy information about [availability of computer code](#)

Data collection

A custom made eye tracking system was used to control and record eye movements during experiments. The visual stimuli were generated by a custom made presentation software 'Visiko', which also recorded eye and behavioral data. Functional MRI data was acquired in a Siemens Allegra 3T system.

Data analysis

Functional MRI data were analyzed using SPM8 (statistical parametric mapping, Wellcome Department of Imaging Neuroscience; London, UK) under Matlab R2010a. Marsbar (region of interest toolbox for SPM version 0.44). was used for ROI analysis. Data visualization was done in caret5 (<http://www.nitrc.org/projects/caret/>). Diffusion MRI data were analyzed using the online platform brainlife.io, links to the code are provided in the text. The following software were used: MRtrix version 0.2.12 (Tournier et al., 2012) for tracking, FreeSurfer tools version 6.0.0, Matlab R2019a, Trackvis version 0.6.1 for visualization. The datasets, along with their provenance (i.e. the pipeline) and the links to the applications used to generate them are available at <https://doi.org/10.25663/BRAINLIFE.PUB.16> for the main diffusion analyses and at <https://doi.org/10.25663/BRAINLIFE.PUB.17> for the control analyses. Individual applications within the pipeline are explained in the method sections and individual links to the online Apps and to the correspondent github repository are also provided in supplementary table 3.

For manuscripts utilizing custom algorithms or software that are central to the research but not yet described in published literature, software must be made available to editors/reviewers. We strongly encourage code deposition in a community repository (e.g. GitHub). See the Nature Research [guidelines for submitting code & software](#) for further information.

### Data

Policy information about [availability of data](#)

All manuscripts must include a [data availability statement](#). This statement should provide the following information, where applicable:

- Accession codes, unique identifiers, or web links for publicly available datasets
- A list of figures that have associated raw data
- A description of any restrictions on data availability

Source data for fMRI figures are enclosed to the manuscript as an excell file. For diffusion MRI analyses data source for the main experiment are available here:

<https://doi.org/10.25663/BRAINLIFE.PUB.16>. Data source for the control experiment are available here <https://doi.org/10.25663/BRAINLIFE.PUB.17>. Other data potentially useful to the reader will be available from the authors upon requests.

## Field-specific reporting

Please select the one below that is the best fit for your research. If you are not sure, read the appropriate sections before making your selection.

Life sciences  Behavioural & social sciences  Ecological, evolutionary & environmental sciences

For a reference copy of the document with all sections, see [nature.com/documents/nr-reporting-summary-flat.pdf](https://www.nature.com/documents/nr-reporting-summary-flat.pdf)

## Life sciences study design

All studies must disclose on these points even when the disclosure is negative.

|                 |                                                                                                                                                                                                                                                                                                                                                                                                                                                                                                                                                                                                                                                                                                                                 |
|-----------------|---------------------------------------------------------------------------------------------------------------------------------------------------------------------------------------------------------------------------------------------------------------------------------------------------------------------------------------------------------------------------------------------------------------------------------------------------------------------------------------------------------------------------------------------------------------------------------------------------------------------------------------------------------------------------------------------------------------------------------|
| Sample size     | Functional data during performance of the attention task (as well as for the localizers) were acquired from 12 subjects. Sample size and experimental approach was chosen after Kolster and colleagues (2010) who localized pHIT successfully and consistently across subjects (11 participants) by using several tasks and localizers. Further details about sample size are provided in the method section.                                                                                                                                                                                                                                                                                                                   |
| Data exclusions | No data were excluded from the analyses                                                                                                                                                                                                                                                                                                                                                                                                                                                                                                                                                                                                                                                                                         |
| Replication     | Analysis were performed at the population level and results were then replicated across individuals. The variations in individual subjects responses was incorporated into statistical testing. The variability in responses across subjects are shown in several supplementary figure and are indicated in each relevant plot with standard errors. Moreover, we related the results to publicly available atlases and previous literature: two independent groups have found consistent results in a different animal species (macaques) and another group isolated the same area with a different approach in humans (Kolster et al., 2010). Code/data/stimuli will available upon request to allow further reproducibility. |
| Randomization   | Randomization procedures were not applied because the study focuses on one group of participants                                                                                                                                                                                                                                                                                                                                                                                                                                                                                                                                                                                                                                |
| Blinding        | Blinding procedures were not applied because the study focuses on one group of participants                                                                                                                                                                                                                                                                                                                                                                                                                                                                                                                                                                                                                                     |

## Reporting for specific materials, systems and methods

We require information from authors about some types of materials, experimental systems and methods used in many studies. Here, indicate whether each material, system or method listed is relevant to your study. If you are not sure if a list item applies to your research, read the appropriate section before selecting a response.

### Materials & experimental systems

| n/a                                 | Involvement in the study                                        |
|-------------------------------------|-----------------------------------------------------------------|
| <input checked="" type="checkbox"/> | <input type="checkbox"/> Antibodies                             |
| <input checked="" type="checkbox"/> | <input type="checkbox"/> Eukaryotic cell lines                  |
| <input checked="" type="checkbox"/> | <input type="checkbox"/> Palaeontology                          |
| <input checked="" type="checkbox"/> | <input type="checkbox"/> Animals and other organisms            |
| <input type="checkbox"/>            | <input checked="" type="checkbox"/> Human research participants |
| <input checked="" type="checkbox"/> | <input type="checkbox"/> Clinical data                          |

### Methods

| n/a                                 | Involvement in the study                                   |
|-------------------------------------|------------------------------------------------------------|
| <input checked="" type="checkbox"/> | <input type="checkbox"/> ChIP-seq                          |
| <input checked="" type="checkbox"/> | <input type="checkbox"/> Flow cytometry                    |
| <input type="checkbox"/>            | <input checked="" type="checkbox"/> MRI-based neuroimaging |

## Human research participants

Policy information about [studies involving human research participants](#)

|                            |                                                                                                                                                                                                                                                                                                                                                                                                                                 |
|----------------------------|---------------------------------------------------------------------------------------------------------------------------------------------------------------------------------------------------------------------------------------------------------------------------------------------------------------------------------------------------------------------------------------------------------------------------------|
| Population characteristics | Twelve volunteers participated in the fMRI experiment (4 females, 6 males; mean age, 23 years +/- 2 years). All participants had normal or corrected-to-normal visual acuity, and no history of mental illness or neurological diseases. Prior to the experiment all volunteers were tested on the Freiburg Visual Acuity Test, the Titmus-Test for stereopsis, and the Ishihara-Test for color-vision.                         |
| Recruitment                | All subjects were recruited from students of psychology and biology at the University of Bremen. The recruitment of young students was particularly important given the challenging nature of the task, which involved the use of eye movements within the scanner in a multi-session experiment. The recruitment of college students is common in neuroimaging studies and we do not foresee any specific bias in the results. |
| Ethics oversight           | The study was approved by the ethics committee of the University of Bremen, and all volunteers gave written consent in accordance with the Helsinki declaration before the experiment.                                                                                                                                                                                                                                          |

Note that full information on the approval of the study protocol must also be provided in the manuscript.

## Magnetic resonance imaging

### Experimental design

|                                 |                                                                                                                                                                                                   |
|---------------------------------|---------------------------------------------------------------------------------------------------------------------------------------------------------------------------------------------------|
| Design type                     | Rapid Serial Visual Presentation (RSVP) task; motion discrimination task; block design                                                                                                            |
| Design specifications           | Each participant performed the task for 18 minutes in alternating blocks; each block consisted in 7 successful trials and approximately 30s; task blocks were separated by 5s of passive fixation |
| Behavioral performance measures | Subject saccades to visual targets were recorded; the task had 5 main behavioral outcomes; performance was assessed by calculating the mean and standard deviation across subjects;               |

### Acquisition

|                               |                                                                                                                                                                                                                               |
|-------------------------------|-------------------------------------------------------------------------------------------------------------------------------------------------------------------------------------------------------------------------------|
| Imaging type(s)               | functional MRI; diffusion MRI from Human Connectome Project                                                                                                                                                                   |
| Field strength                | 3T                                                                                                                                                                                                                            |
| Sequence & imaging parameters | Functional time series consisted of single-shot echo-planar images (EPI): repetition time (TR) 2.51s, echo time (TE) 30ms, flip angle 85 deg, field of view 192x192mm and 3 x 3 x 2.7 mm <sup>3</sup> voxel size (38 slices). |
| Area of acquisition           | whole brain scan                                                                                                                                                                                                              |
| Diffusion MRI                 | <input checked="" type="checkbox"/> Used <input type="checkbox"/> Not used                                                                                                                                                    |
| Parameters                    | We used data from HCP; The HCP data were acquired at multiple b-values (b = 1000, 2000 and 3000 s/mm <sup>2</sup> ) and 90 diffusion directions per gradient strength, with 1.25 mm isotropic resolution.                     |

### Preprocessing

|                            |                                                                                                                                                                                                                                                                                                                                |
|----------------------------|--------------------------------------------------------------------------------------------------------------------------------------------------------------------------------------------------------------------------------------------------------------------------------------------------------------------------------|
| Preprocessing software     | Functional scans were slice-time- and motion- corrected, spatially smoothed with a Gaussian kernel of 7mm full-width-at-half-max and finally co-registered and warped to SPM8 standard space. Diffusion data were preprocessed by WU-Minn HCP 543 Consortiums using methods that are described in (Sotiropoulos et al., 2013). |
| Normalization              | The standard normalization built-in procedure of SPM8 was used.                                                                                                                                                                                                                                                                |
| Normalization template     | ICBM template                                                                                                                                                                                                                                                                                                                  |
| Noise and artifact removal | A 6 DOF (degree of freedom) rigid body motion correction was applied. A correction of heart rate or respiration has not been applied.                                                                                                                                                                                          |
| Volume censoring           | No volume censoring was applied.                                                                                                                                                                                                                                                                                               |

### Statistical modeling & inference

|                                                                           |                                                                                                                                                                                                                                                                                                 |
|---------------------------------------------------------------------------|-------------------------------------------------------------------------------------------------------------------------------------------------------------------------------------------------------------------------------------------------------------------------------------------------|
| Model type and settings                                                   | A fixed effects model analysis was used                                                                                                                                                                                                                                                         |
| Effect(s) tested                                                          | An ANOVA revealed an increased activity in motion selective cortical areas as well as in areas of the frontal and parietal lobe in trials in which the stimulus in the contra lateral hemifield was attended. Intriguingly also a temporal area showed an increased activity for this condition |
| Specify type of analysis:                                                 | <input type="checkbox"/> Whole brain <input type="checkbox"/> ROI-based <input checked="" type="checkbox"/> Both                                                                                                                                                                                |
| Anatomical location(s)                                                    | The Glasser atlas (Glasser et al., 2016) was used for brain parcellation.                                                                                                                                                                                                                       |
| Statistic type for inference<br>(See <a href="#">Eklund et al. 2016</a> ) | Voxel-wise inference - uncorrected p-values.                                                                                                                                                                                                                                                    |
| Correction                                                                | Activation during active attention task was contrasted with fixation task and shown at a significance level of p<0.001 FWE (family-wise error)                                                                                                                                                  |

### Models & analysis

|                                     |                                                                       |
|-------------------------------------|-----------------------------------------------------------------------|
| n/a                                 | Included in the study                                                 |
| <input checked="" type="checkbox"/> | <input type="checkbox"/> Functional and/or effective connectivity     |
| <input checked="" type="checkbox"/> | <input type="checkbox"/> Graph analysis                               |
| <input checked="" type="checkbox"/> | <input type="checkbox"/> Multivariate modeling or predictive analysis |
